# Supplementary material for: Diet and Other Modifiable Factors in Long-Term Decline of Kidney Function: Observational and Population-Based Cohort Study
Source: MDPI journal article supplement (doi:10.3390/nu15204337), 2023-10-11
Supplement: s1 [file s1]

**Supplementary  
Materials**

**Table S1** – Descriptive statistics at the follow-up exam in the 3039 examinees with complete data (43.9% men): prevalence for categorical variables, mean $\pm$ SD for numerical non-skewed variables, and median (IQR) for numerical skewed variables.

|                                                    | Data at the follow-up exam |
|----------------------------------------------------|----------------------------|
| Age, years                                         | 59.5 $\pm$ 13.6            |
| Habitual physical activity in leisure time, min/d  | 20 (0/40)                  |
| Habitual alcohol intake, g/d                       | 6 (0/24)                   |
| Overnight urine urea/creatinine ratio, g/g         | n.a.                       |
| Overnight urine sodium/creatinine ratio, mmol/g    | n.a.                       |
| Overnight urine potassium/creatinine ratio, mmol/g | n.a.                       |
| Serum creatinine, $\mu$ mol/L                      | 80 (73/87)                 |
| eGFR, mL/min x 1.73 m <sup>2</sup>                 | 80.1 $\pm$ 15.3            |
| Low kidney function, %                             | 9.0%                       |
| Estimated 24-hour urinary creatinine, g/d          | 1.21 $\pm$ 0.34            |
| Obesity, %                                         | 21.7%                      |
| Smoking, %                                         | 21.7%                      |
| Hypertension, %                                    | 51.8%                      |
| Diabetes, %                                        | 7.9%                       |
| Hyperuricemia, %                                   | n.a.                       |
| Cardiovascular disease, %                          | 7.8%                       |

n.a. = not available

**Table S2** – Descriptive statistics at the baseline exam of the variables used for validation of the assessments of the modifiable factors: mean $\pm$ SD for numerical non-skewed variables and median (IQR) for numerical skewed variables.

|                                       |                  |
|---------------------------------------|------------------|
| Number of examinees                   | 4669             |
| Heart rate, b/min                     | 71.5 $\pm$ 10.4  |
| Serum gamma-glutamyl-transferase, U/L | 22 (15/35)       |
| Serum urea, mmol/L                    | 5.83 (5.00/6.83) |
| Hematocrit, %                         | 42.7 $\pm$ 3.9   |
| Serum potassium, mmol/L               | 4.13 $\pm$ 0.37  |

**Table S3** – Tertiles of habitual physical activity in leisure time at the baseline exam: number of examinees, median of physical activity, factor-specific score, gender prevalence, mean age, and mean of heart rate used as the validation variable.

|                                                                                             | Tertile of physical activity |        |       |                             |
|---------------------------------------------------------------------------------------------|------------------------------|--------|-------|-----------------------------|
|                                                                                             | 1                            | 2      | 3     |                             |
| Tertiles thresholds, habitual physical activity in leisure time at the baseline exam, min/d | < 6                          | 6 – 15 | > 15  | <i>P<br/>for<br/>trend*</i> |
| Number of examinees                                                                         | 1992                         | 1625   | 1052  |                             |
| Median of habitual physical activity in leisure time at the baseline exam, min/d            | 0                            | 15     | 45    |                             |
| Factor-specific score                                                                       | 2                            | 1      | 0     |                             |
| % men                                                                                       | 37.1%                        | 40.1%  | 68.3% | <0.001                      |
| Age, years                                                                                  | 51.6                         | 53.6   | 41.4  | < 0.001                     |
| Heart rate, b/min                                                                           |                              |        |       |                             |
| Non-adjusted                                                                                | 72.7                         | 71.7   | 69.0  | < 0.001                     |
| ANOVA adjusted for sex and age                                                              | 72.6                         | 71.8   | 69.1  | < 0.001                     |

\* by chi-square or ANOVA

Standardized regression coefficient of heart rate over log-transformed activity at the baseline exam: -0.127 in single-variable regression and -0.111 in regression adjusted for sex and age ( $P < 0.001$ ).

**Table S4** – Tertiles of habitual alcohol intake at the baseline exam: number of examinees, median of intake, factor-specific score, gender prevalence, mean age, and mean of serum gammaglutamyl-transferase used as the validation variable.

|                                                                        | Tertile of alcohol intake |        |       |                             |
|------------------------------------------------------------------------|---------------------------|--------|-------|-----------------------------|
|                                                                        | 1                         | 2      | 3     |                             |
| Tertiles thresholds, habitual alcohol intake at the baseline exam, g/d | < 2                       | 2 – 23 | > 23  | <i>P<br/>for<br/>trend*</i> |
| Number of individuals                                                  | 1558                      | 1289   | 1822  |                             |
| Median alcohol intake, g/d                                             | 0                         | 12     | 36    |                             |
| Factor-specific score                                                  | 2                         | 1      | 0     |                             |
| % men                                                                  | 23.0%                     | 34.4%  | 71.7% | <0.001                      |
| Age, years                                                             | 46.0                      | 50.4   | 53.0  | <0.001                      |
| Serum gammaglutamyl-transferase, U/L                                   |                           |        |       |                             |
| Non-adjusted                                                           | 22.7                      | 26.3   | 43.7  | <0.001                      |
| ANOVA adjusted for sex and age                                         | 26.6                      | 27.7   | 39.4  | <0.001                      |

\* by chi-square or ANOVA

Standardized regression coefficient of serum gammaglutamyl-transferase over log-transformed alcohol intake at the baseline exam: 0.262 in single-variable regression and 0.174 in regression adjusted for sex and age ( $P < 0.001$ ).

**Table S5** – Tertiles of urea/creatinine ratio in overnight urine at the baseline exam: number of examinees, median of urinary urea, factor-specific score, gender prevalence, mean age, and mean of serum urea used as the validation variable.

|                                                  |           | Tertile of urea/creatinine ratio |             |        |                           |
|--------------------------------------------------|-----------|----------------------------------|-------------|--------|---------------------------|
|                                                  |           | 1                                | 2           | 3      |                           |
| Tertile thresholds of urea/creatinine ratio, g/g |           |                                  |             |        |                           |
| Men                                              | age 18-24 | < 11.8                           | 11.9 – 14.8 | > 14.8 | <i>P</i><br>for<br>trend* |
|                                                  | age 25-34 | < 11.3                           | 11.4 – 14.1 | > 14.1 |                           |
|                                                  | age 35-44 | < 12.0                           | 12.1 – 15.6 | > 15.6 |                           |
|                                                  | age 45-54 | < 12.4                           | 12.5 – 15.6 | > 15.6 |                           |
|                                                  | age 55-64 | < 13.1                           | 13.2 – 16.9 | > 16.9 |                           |
|                                                  | age 65-74 | < 13.3                           | 13.4 – 17.5 | > 17.5 |                           |
|                                                  | age 75-84 | < 13.1                           | 13.2 – 17.1 | > 17.1 |                           |
|                                                  | age > 84  | < 11.1                           | 11.2 – 17.3 | > 17.3 |                           |
| Women                                            | age 18-24 | < 12.6                           | 12.7 – 16.9 | > 16.9 |                           |
|                                                  | age 25-34 | < 13.1                           | 13.2 – 18.0 | > 18.0 |                           |
|                                                  | age 35-44 | < 15.0                           | 15.1 – 19.3 | > 19.3 |                           |
|                                                  | age 45-54 | < 16.3                           | 16.4 – 21.2 | > 21.2 |                           |
|                                                  | age 55-64 | < 17.3                           | 17.4 – 22.3 | > 22.3 |                           |
|                                                  | age 65-74 | < 17.1                           | 17.2 – 22.9 | > 22.9 |                           |
|                                                  | age 75-84 | < 17.1                           | 17.2 – 22.3 | > 22.3 |                           |
|                                                  | age > 84  | < 14.8                           | 14.9 – 20.3 | > 20.3 |                           |
| Number of examinees                              |           | 1421                             | 1827        | 1421   |                           |
| Median of urea/creatinine ratio, g/g             |           | 11.2                             | 15.9        | 22.7   |                           |
| Factor-specific score                            |           | 0                                | 1           | 2      |                           |
| % men                                            |           | 45.2%                            | 45.1%       | 45.2%  | 0.999                     |
| Age, years                                       |           | 49.8                             | 50.1        | 50.0   | 0.725                     |
| Serum urea, mmol/L                               |           |                                  |             |        |                           |
| Non-adjusted                                     |           | 5.50                             | 6.00        | 6.17   | <0.001                    |
| Adjusted for sex and age                         |           | 5.71                             | 6.06        | 6.34   | <0.001                    |

Tertiles were defined separately in men and women by age strata.

\* by chi-square or ANOVA

Standardized regression coefficient of serum urea over log-transformed urinary urea/creatinine ratio at the baseline exam: 0.977 in single-variable regression and 0.976 in regression adjusted for sex and age ( $P < 0.001$ ).

**Table S6** – Tertiles of sodium/creatinine ratio in overnight urine at the baseline exam: number of examinees, median of urinary sodium, factor-specific score, gender prevalence, mean age, and mean of hematocrit used as the validation variable.

|                                                                           |           | Tertile of sodium/creatinine ratio |           |       |                     |
|---------------------------------------------------------------------------|-----------|------------------------------------|-----------|-------|---------------------|
|                                                                           |           | 1                                  | 2         | 3     |                     |
| Tertiles thresholds, sodium/creatinine ratio at the baseline exam, mmol/g |           |                                    |           |       |                     |
| Men                                                                       | age 18-24 | < 50                               | 50 – 79   | > 79  | <i>P for trend*</i> |
|                                                                           | age 25-34 | < 50                               | 50 – 83   | > 83  |                     |
|                                                                           | age 35-44 | < 65                               | 65 – 99   | > 99  |                     |
|                                                                           | age 45-54 | < 73                               | 73 – 115  | > 115 |                     |
|                                                                           | age 55-64 | < 94                               | 94 – 143  | > 143 |                     |
|                                                                           | age 65-74 | < 104                              | 104 – 144 | > 144 |                     |
|                                                                           | age 75-84 | < 106                              | 106 – 162 | > 162 |                     |
|                                                                           | age > 84  | < 103                              | 103 – 158 | > 158 |                     |
| Women                                                                     | age 18-24 | < 58                               | 58 – 102  | > 102 |                     |
|                                                                           | age 25-34 | < 71                               | 71 – 107  | > 107 |                     |
|                                                                           | age 35-44 | < 79                               | 79 – 125  | > 125 |                     |
|                                                                           | age 45-54 | < 95                               | 95 – 142  | > 142 |                     |
|                                                                           | age 55-64 | < 104                              | 104 – 156 | > 156 |                     |
|                                                                           | age 65-74 | < 118                              | 118 – 178 | > 178 |                     |
|                                                                           | age 75-84 | < 131                              | 131 – 214 | > 214 |                     |
|                                                                           | age > 84  | < 143                              | 143 – 234 | > 234 |                     |
| Number of individuals                                                     |           | 1502                               | 1616      | 1551  |                     |
| Median of sodium/creatinine ratio, mmol/g                                 |           | 59                                 | 107       | 176   |                     |
| Factor-specific score                                                     |           | 0                                  | 1         | 2     |                     |
| % men                                                                     |           | 45.0%                              | 44.9%     | 45.5% | 0.775               |
| Age, years                                                                |           | 49.7                               | 50.2      | 50.1  | 0.561               |
| Hematocrit, %                                                             |           |                                    |           |       |                     |
| Non-adjusted                                                              |           | 42.8                               | 42.7      | 42.5  | 0.023               |
| Adjusted for sex and age                                                  |           | 42.9                               | 42.7      | 42.5  | 0.002               |

Tertiles were defined separately in men and women by age strata.

\* by chi-square or ANOVA

Standardized regression coefficient of hematocrit over log-transformed urinary sodium/creatinine ratio at the baseline exam: -0.125 in single-variable regression and -0.043 in regression adjusted for sex and age ( $P \leq 0.001$ ).

**Table S7** – Tertiles of potassium/creatinine ratio in overnight urine at the baseline exam: number of examinees, median of urinary potassium, factor-specific score, gender prevalence, mean age, and mean of serum potassium used as the validation variable.

|                                                                              |           | Tertile of potassium/creatinine ratio |         |       |                     |
|------------------------------------------------------------------------------|-----------|---------------------------------------|---------|-------|---------------------|
|                                                                              |           | 1                                     | 2       | 3     |                     |
| Number of individuals                                                        |           | 1501                                  | 1639    | 1529  |                     |
| Tertiles thresholds, potassium/creatinine ratio at the baseline exam, mmol/g |           |                                       |         |       |                     |
| Men                                                                          | age 18-24 | < 13                                  | 13 – 19 | > 19  |                     |
|                                                                              | age 25-34 | < 14                                  | 14 – 21 | > 21  |                     |
|                                                                              | age 35-44 | < 17                                  | 17 – 24 | > 24  |                     |
|                                                                              | age 45-54 | < 19                                  | 19 – 25 | > 25  |                     |
|                                                                              | age 55-64 | < 22                                  | 22 – 31 | > 31  |                     |
|                                                                              | age 65-74 | < 24                                  | 24 – 33 | > 33  |                     |
|                                                                              | age 75-84 | < 24                                  | 24 – 36 | > 36  |                     |
|                                                                              | age > 84  | < 22                                  | 22 – 41 | > 41  |                     |
| Women                                                                        | age 18-24 | < 18                                  | 18 – 26 | > 26  |                     |
|                                                                              | age 25-34 | < 19                                  | 19 – 27 | > 27  |                     |
|                                                                              | age 35-44 | < 22                                  | 22 – 29 | > 29  |                     |
|                                                                              | age 45-54 | < 23                                  | 23 – 32 | > 32  |                     |
|                                                                              | age 55-64 | < 25                                  | 25 – 34 | > 34  |                     |
|                                                                              | age 65-74 | < 28                                  | 28 – 38 | > 38  |                     |
|                                                                              | age 75-84 | < 32                                  | 32 – 42 | > 42  |                     |
|                                                                              | age > 84  | < 32                                  | 32 – 49 | > 49  |                     |
| Median of potassium/creatinine ratio, mmol/g                                 |           | 17.2                                  | 25.7    | 39.5  | <i>P for trend*</i> |
| Factor-specific score                                                        |           | 2                                     | 1       | 0     |                     |
| % men                                                                        |           | 44.6%                                 | 45.9%   | 44.9% | 0.845               |
| Age, years                                                                   |           | 49.1                                  | 50.3    | 50.4  | 0.144               |
| Serum potassium, mmol/L                                                      |           |                                       |         |       |                     |
| Non-adjusted                                                                 |           | 4.10                                  | 4.13    | 4.18  | <0.001              |
| Adjusted for sex and age                                                     |           | 4.10                                  | 4.13    | 4.17  | <0.001              |

Tertiles were defined separately in men and women by age strata.

\* by chi-square or ANOVA

Standardized regression coefficient of serum potassium over log-transformed urinary potassium/creatinine ratio at the baseline exam: 0.106 in single-variable regression and 0.089 in regression adjusted for sex and age ( $P < 0.001$ ).



**Table S8** – Consistency over time of the habitual physical activity in leisure time: median of activity at the baseline exam and at the follow-up exam by tertile of activity at the baseline exam.

|                                                                                   | Tertile of physical activity<br>at the baseline exam |     |     | <i>P</i><br>for<br>trend* |
|-----------------------------------------------------------------------------------|------------------------------------------------------|-----|-----|---------------------------|
|                                                                                   | 1                                                    | 2   | 3   |                           |
| Number of examinees with complete data at baseline exam and follow-up exam        | 1230                                                 | 993 | 747 |                           |
| Median of habitual physical activity in leisure time at the baseline exam, min/d  | 0                                                    | 12  | 43  | $< 0.001$                 |
| Median of habitual physical activity in leisure time at the follow-up exam, min/d | 15                                                   | 20  | 30  | $< 0.001$                 |

\* by ANOVA

Standardized regression coefficient of the log-transformed physical activity at the follow-up exam over the log-transformed physical activity at the baseline exam: 0.139 in single-variable regression and 0.114 in regression adjusted for sex and age ( $P<0.001$ ).

**Table S9** – Consistency over time of the habitual alcohol intake: median of intake at the baseline exam and the follow-up exam by tertile of intake at the baseline exam.

|                                                                                | Tertile of alcohol intake<br>at the baseline exam |     |      |                            |
|--------------------------------------------------------------------------------|---------------------------------------------------|-----|------|----------------------------|
|                                                                                | 1                                                 | 2   | 3    |                            |
| Number of examinees with complete data at the baseline exam and follow-up exam | 1046                                              | 819 | 1169 | <i>P<br/>for<br/>trend</i> |
| Median of habitual alcohol intake at the baseline exam, g/d                    | 0                                                 | 12  | 36   | $< 0.001$                  |
| Median of habitual alcohol intake at the follow-up exam, g/d                   | 0                                                 | 4   | 24   | $< 0.001$                  |

\* by ANOVA

Standardized regression coefficient of the log-transformed alcohol intake at the follow-up exam over the log-transformed alcohol intake at the baseline exam: 0.629 in single-variable regression and 0.513 in regression adjusted for sex and age ( $P < 0.001$ ).

**Table S10** – Consistency of urinary urea/creatinine ratio over time and over different types of urine collections: median of the urea/creatinine ratio in the overnight urine collection of the baseline exam and in the 24-hour urine collection of the exam of the Intersalt study by tertile of urea/creatinine ratio at the baseline exam<sup>§</sup>.

|                                                                                                    | Tertile of urea/creatinine ratio<br>at the baseline exam <sup>§</sup> |      |      |                             |
|----------------------------------------------------------------------------------------------------|-----------------------------------------------------------------------|------|------|-----------------------------|
|                                                                                                    | 1                                                                     | 2    | 3    |                             |
| Number of examinees with complete data at the baseline exam and at the exam of the Intersalt study | 54                                                                    | 56   | 48   | <i>P<br/>for<br/>trend*</i> |
| Urinary urea/creatinine ratio in the overnight collection of the baseline exam                     | 12.0                                                                  | 15.2 | 21.9 | <i>&lt; 0.001</i>           |
| Urinary urea/creatinine ratio in the 24-hour collection of the exam of the Intersalt Study         | 14.8                                                                  | 16.0 | 18.3 | <i>&lt; 0.001</i>           |

Date of the exam of the Intersalt study: 1983-86

Date of the baseline exam: 1989-92

<sup>§</sup>Tertiles were defined separately in men and women for the following strata of age: 18-24, 25-34, 35-44, 45-54, 55-64, 65-74, 75-84, and  $\geq 85$  years.

\* by ANOVA

Standardized regression coefficient of the log-transformed urinary urea/creatinine ratio in the 24-hour urine collection of the Intersalt study over the log-transformed urinary urea/creatinine ratio in the overnight urine collection of the baseline exam: 0.239 in single-variable regression and 0.230 in regression adjusted for sex and age ( $P < 0.001$ ).

**Table S11** – Consistency of urinary sodium/creatinine ratio over time and over different types of urine collections: median of the sodium/creatinine ratio in the overnight urine collection of the baseline exam and in the 24-hour urine collection of the exam of the Intersalt study by tertile of sodium/creatinine ratio at the baseline exam<sup>§</sup>.

|                                                                                                    | Tertile of sodium/creatinine ratio<br>at the baseline exam <sup>§</sup> |     |     |                             |
|----------------------------------------------------------------------------------------------------|-------------------------------------------------------------------------|-----|-----|-----------------------------|
|                                                                                                    | 1                                                                       | 2   | 3   |                             |
| Number of examinees with complete data at the baseline exam and at the exam of the Intersalt study | 57                                                                      | 54  | 57  | <i>P<br/>for<br/>trend*</i> |
| Urinary sodium/creatinine ratio in the overnight urine collection of the baseline exam             | 59                                                                      | 96  | 169 | <i>&lt; 0.001</i>           |
| Urinary sodium/creatinine ratio in 24-hour urine collection of the exam of the Intersalt Study     | 105                                                                     | 129 | 154 | <i>&lt; 0.001</i>           |

Date of the exam of the Intersalt Study: 1983-86

Date of the baseline exam: 1989-92

<sup>§</sup>Tertiles were defined separately in men and women for the following strata of age: 18-24, 25-34, 35-44, 45-54, 55-64, 65-74, 75-84, and  $\geq 85$  years.

\* by ANOVA

Standardized regression coefficient of the log-transformed urinary sodium/creatinine ratio in the 24-hour urine collection of the Intersalt study over the log-transformed urinary sodium/creatinine ratio in the overnight urine collection of the baseline exam: 0.212 in single-variable regression and 0.158 in regression adjusted for sex and age ( $P < 0.05$ ).

**Table S12** – Consistency of urinary potassium over time and over different types of urine collections: median of the potassium/creatinine ratio in the overnight urine collection of the baseline exam and in the 24-hour urine collection of the exam of the Intersalt study by tertile of potassium/creatinine ratio at the baseline exam<sup>§</sup>.

|                                                                                                    | Tertile of potassium/creatinine ratio at the baseline exam <sup>§</sup> |    |    |                     |
|----------------------------------------------------------------------------------------------------|-------------------------------------------------------------------------|----|----|---------------------|
|                                                                                                    | 1                                                                       | 2  | 3  |                     |
| Number of examinees with complete data at the baseline exam and at the exam of the Intersalt study | 57                                                                      | 61 | 50 | <i>P for trend*</i> |
| Urinary potassium/creatinine ratio in the overnight urine collection of the baseline exam          | 16                                                                      | 24 | 35 | $< 0.001$           |
| Urinary potassium/creatinine ratio in the 24-hour urine collection of exam of the Intersalt Study  | 31                                                                      | 44 | 54 | $< 0.001$           |

Date of the exam of the Intersalt Study: 1983-86

Date of the baseline exam: 1989-92

<sup>§</sup>Tertiles were defined separately in men and women for the following strata of age: 18-24, 25-34, 35-44, 45-54, 55-64, 65-74, 75-84, and  $\geq 85$  years.

\* by ANOVA

Standardized regression coefficient of the log-transformed urinary potassium/creatinine ratio in the 24-hour urine collection of the Intersalt study over the log-transformed urinary potassium/creatinine ratio in the overnight urine collection of the baseline exam: 0.275 in single-variable regression and 0.160 in regression adjusted for sex and age ( $P < 0.04$ ).

**Figure S1** - Frequency distribution of the cumulative score in the 4669 examinees with baseline data. Upper panel: distribution before merging the low-n tails (skewness = 0.035, mean $\pm$ SD = 5 $\pm$ 2); lower panel: distribution after merging score 0 into score 1 and score 10 into score 9 (skewness = 0.016, mean $\pm$ SD = 5 $\pm$ 2).

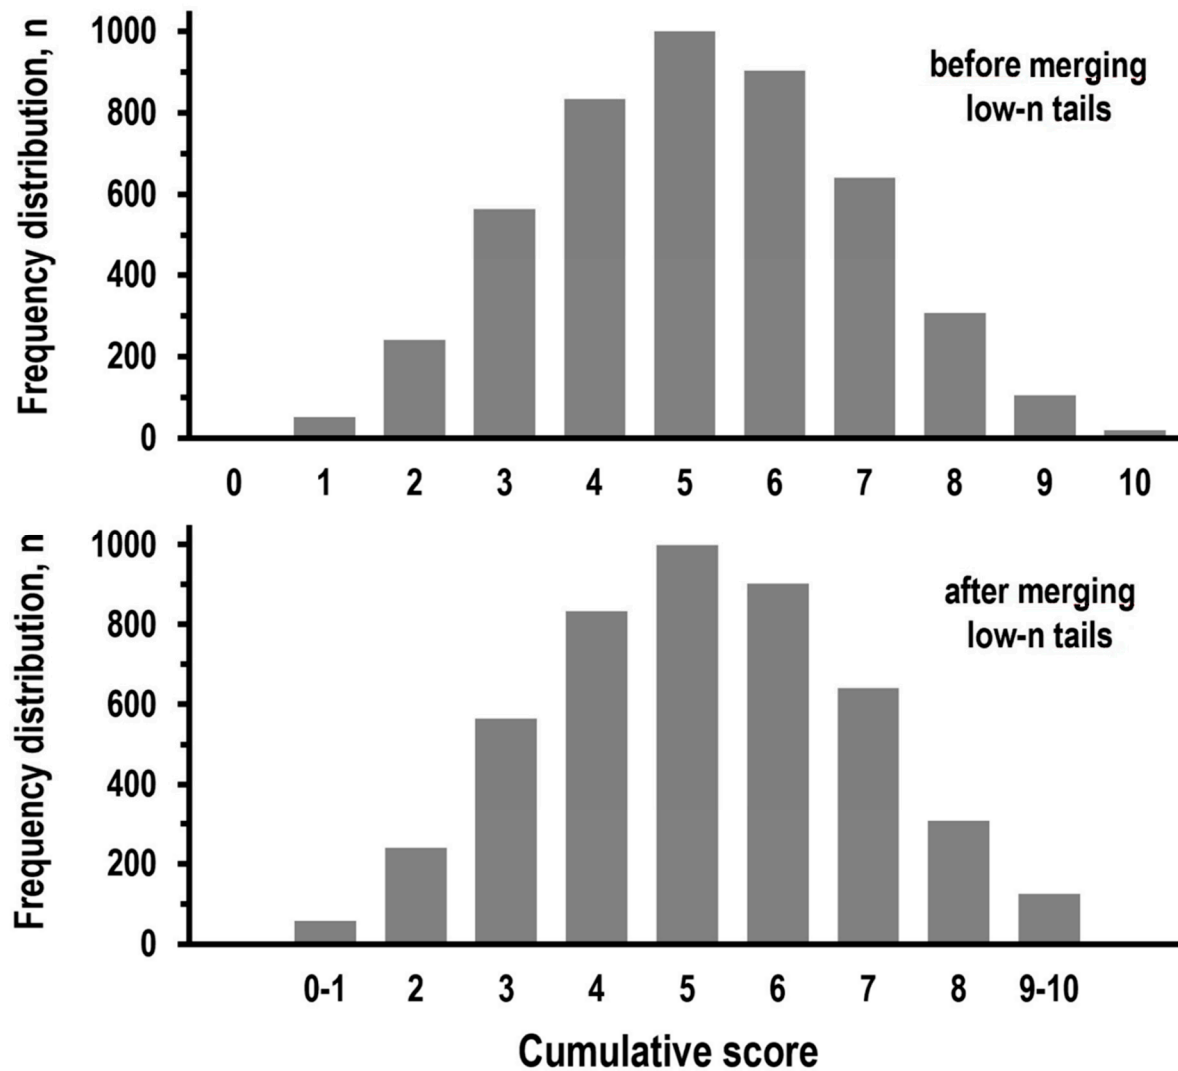

**Figure S2** - Frequency distribution of the cumulative score in the examinees with complete baseline data and follow-up data (upper panel, skewness = 0.019, mean $\pm$ SD = 5 $\pm$ 2) and in the examinees with complete baseline data and follow-up data and without low kidney function at baseline (lower panel, skewness = 0.022, mean $\pm$ SD = 5 $\pm$ 2).

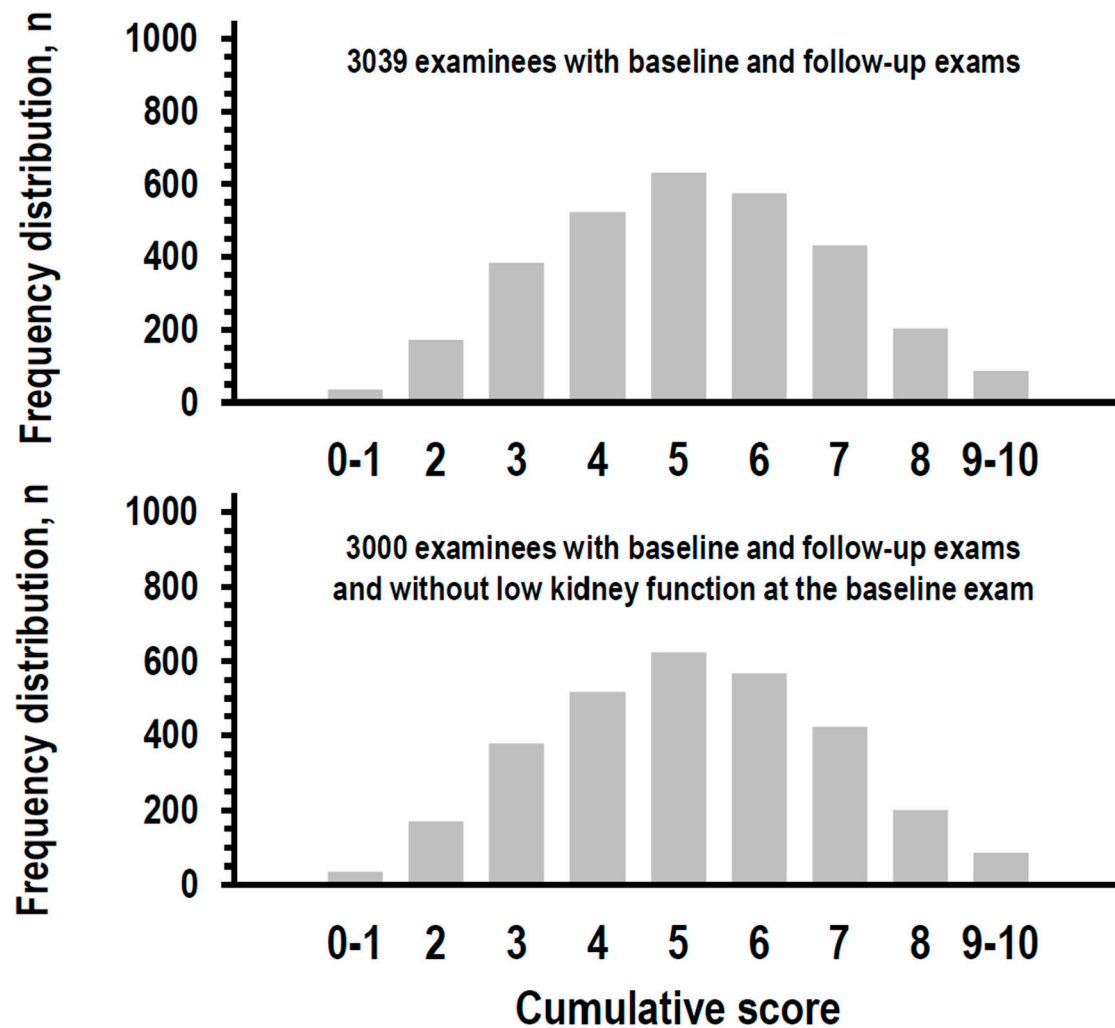

**Table S13** – Baseline means by the cumulative score of the variable used as proxy of the modifiable factors.

| Score                                          | N examinees | Heart rate, b/min | Serum gamma-glutamyl-transferase, U/L | Serum urea mmol/L | Hematocrit, %     | Serum potassium, mmol/L |
|------------------------------------------------|-------------|-------------------|---------------------------------------|-------------------|-------------------|-------------------------|
| 0-1                                            | 58          | 71.1              | 73.8                                  | 5.76              | 45.0              | 4.18                    |
| 2                                              | 240         | 70.9              | 46.6                                  | 5.90              | 44.3              | 4.17                    |
| 3                                              | 564         | 70.7              | 36.2                                  | 5.85              | 43.8              | 4.17                    |
| 4                                              | 834         | 70.6              | 35.2                                  | 5.96              | 43.4              | 4.13                    |
| 5                                              | 999         | 71.2              | 30.5                                  | 6.09              | 42.8              | 4.13                    |
| 6                                              | 903         | 72.4              | 28.3                                  | 6.07              | 41.9              | 4.12                    |
| 7                                              | 641         | 72.2              | 27.7                                  | 6.23              | 41.8              | 4.15                    |
| 8                                              | 306         | 72.1              | 23.0                                  | 6.07              | 41.3              | 4.10                    |
| 9-10                                           | 124         | 73.4              | 23.9                                  | 6.13              | 41.6              | 4.11                    |
| <i>*P for trend along the cumulative score</i> |             | <i>&lt; 0.001</i> | <i>&lt; 0.001</i>                     | <i>&lt; 0.001</i> | <i>&lt; 0.001</i> | <i>0.010</i>            |

\* by ANOVA
